# Supplementary material for: Meditators’ Non-academic Definition of Mindfulness
Source: Springer Nature journal article supplement (doi:10.1007/s12671-022-01899-3), 2022-05-24
Supplement: MOESM1 [file 22838562]

**Supplementary Materials:**

We have publicly published the raw data and the structure of the categorization system carried out to obtain the themes and sub-themes in the following link:

[https://osf.io/7yrwd/?view\\_only=ac470e10ecc343d7981bf2ea464dfe16](https://osf.io/7yrwd/?view_only=ac470e10ecc343d7981bf2ea464dfe16)
